# Supplementary material
Source: PubMed Central journal article supplement (PMC8948161)

**Supplemental information**

**Whole-exome sequencing improves  
the diagnosis and care of men  
with non-obstructive azoospermia**

**Zine-Eddine Kherraf, Caroline Cazin, Amine Bouker, Selima Fourati Ben Mustapha, Sylviane Hennebicq, Amandine Septier, Charles Coutton, Laure Raymond, Marc Nouchy, Nicolas Thierry-Mieg, Raoudha Zouari, Christophe Arnoult, and Pierre F. Ray**

Supplementary table 1: Origin and clinical information on all included patients.

| <b>sampleID</b> | <b>Country of origin</b> | <b>Testicular Phenotype</b> | <b>TESE</b> |
|-----------------|--------------------------|-----------------------------|-------------|
| P0074           | Algeria                  | MeA                         | NEG         |
| P0075           | Tunisia                  | SCOS                        | NEG         |
| P0080           | Algeria                  | HS                          | POS         |
| P0081           | Algeria                  | SCOS                        | NEG         |
| P0082           | Algeria                  | MeA                         | NEG         |
| P0083           | Tunisia                  | PrMeA                       | NEG         |
| P0084           | Tunisia                  | TD                          | NEG         |
| P0085           | Algeria                  | MeA                         | NEG         |
| P0086           | Tunisia                  | MeA                         | NEG         |
| P0087           | Tunisia                  | SCOS and PoMeA              | NEG         |
| P0088           | Tunisia                  | MeA                         | NEG         |
| P0089           | Tunisia                  | SCOS                        | NEG         |
| P0090           | Tunisia                  | SCOS                        | NEG         |
| P0091           | Tunisia                  | SCOS                        | NEG         |
| P0092           | Algeria                  | SCOS                        | NEG         |
| P0093           | Algeria                  | PoMeA                       | NEG         |
| P0109           | Algeria                  | MeA                         | NEG         |
| P0110           | Tunisia                  | MeA                         | NEG         |
| P0111           | Tunisia                  | SCOS                        | NEG         |
| P0112           | Algeria                  | SCOS                        | NEG         |
| P0113           | Algeria                  | SCOS                        | NEG         |
| P0133           | Tunisia                  | SCOS                        | POS         |
| P0134           | Algeria                  | HS                          | POS         |
| P0135           | Algeria                  | TD                          | POS         |
| P0136           | Algeria                  | TD                          | POS         |
| P0137           | Algeria                  | PrMeA                       | NEG         |
| P0138           | Algeria                  | TD                          | NEG         |
| P0139           | Algeria                  | TD                          | NEG         |
| P0140           | Algeria                  | SCOS                        | POS         |
| P0141           | Algeria                  | SCOS                        | NEG         |
| P0142           | Algeria                  | MeA                         | NEG         |
| P0143           | Tunisia                  | SCOS                        | NEG         |
| P0144           | Tunisia                  | MeA                         | NEG         |
| P0145           | Algeria                  | MeA                         | NEG         |
| P0195           | Tunisia                  | SCOS                        | NEG         |
| P0196           | Algeria                  | TD                          | NEG         |
| P0202           | Algeria                  | MeA                         | NEG         |
| P0203           | Tunisia                  | MeA                         | NEG         |
| P0242           | Algeria                  | PrMeA                       | NEG         |
| P0243           | Tunisia                  | MeA                         | NEG         |
| P0252           | Algeria                  | PoMeA                       | NEG         |
| P0253           | Tunisia                  | HS                          | POS         |

|       |            |             |     |
|-------|------------|-------------|-----|
| P0254 | Tunisia    | TD          | POS |
| P0255 | Tunisia    | HS and TD   | POS |
| P0256 | Lybia      | HS          | POS |
| P0257 | Tunisia    | PoMeA       | NEG |
| P0258 | Tunisia    | HS          | POS |
| P0259 | Tunisia    | HS          | POS |
| P0260 | Algeria    | TD          | NEG |
| P0270 | Tunisia    | TD          | POS |
| P0271 | Algeria    | HS          | POS |
| P0272 | Algeria    | HS          | POS |
| P0273 | Tunisia    | SCOS        | POS |
| P0274 | Tunisia    | MeA         | POS |
| P0275 | Tunisia    | SCOS        | NEG |
| P0276 | Tunisia    | TD          | NEG |
| P0277 | Algeria    | SCOS        | NEG |
| P0278 | Tunisia    | MeA         | NEG |
| P0279 | Tunisia    | MeA         | NEG |
| P0280 | Tunisia    | TD          | NEG |
| P0281 | Tunisia    | SCOS        | NEG |
| P0282 | Tunisia    | SCOS        | NEG |
| P0283 | Tunisia    | PoMeA       | NEG |
| P0321 | Tunisia    | MeA         | NEG |
| P0322 | Algeria    | SCOS        | NEG |
| P0323 | Algeria    | PoMeA       | POS |
| P0324 | Tunisia    | SCOS        | NEG |
| P0325 | Tunisia    | HS and TD   | POS |
| P0326 | Algeria    | MeA         | NEG |
| P0327 | Tunisia    | PoMeA       | POS |
| P0328 | Algeria    | SCOS        | NEG |
| P0349 | Tunisia    | SCOS        | NEG |
| P0350 | Tunisia    | MeA         | NEG |
| P0351 | Tunisia    | SCOS        | NEG |
| P0352 | Algeria    | MeA         | POS |
| P0353 | Algeria    | SCOS        | NEG |
| P0354 | Lybia      | SCOS        | NEG |
| P0355 | Tunisia    | MeA         | NEG |
| P0356 | Lybia      | SCOS        | NEG |
| P0357 | Tunisia    | SCOS        | NEG |
| P0358 | Tunisia    | HS          | POS |
| P0359 | Lybia      | PrMeA       | NEG |
| P0360 | Algeria    | HS          | POS |
| P0361 | Algeria    | SCOS        | NEG |
| P0362 | Tunisia    | SCOS        | NEG |
| P0363 | Mauritania | SCOS and TD | NEG |
| P0364 | Algeria    | PrMeA       | POS |
| P0365 | Tunisia    | HS          | POS |

|       |         |       |     |
|-------|---------|-------|-----|
| P0366 | Tunisia | SCOS  | NEG |
| P0368 | Algeria | MeA   | NEG |
| P0369 | Tunisia | MeA   | NEG |
| P0370 | Tunisia | SCOS  | NEG |
| P0394 | Tunisia | SCOS  | NEG |
| P0400 | Tunisia | SCOS  | NEG |
| P0408 | Tunisia | PrMeA | NEG |
| P0433 | Algeria | HS    | POS |

---

Supplementary table 2: List of all nucleotide primers used in the study.

| Gene name      | Primer sequence (5'-3')   | Tm (°C) | Product length (bp) |
|----------------|---------------------------|---------|---------------------|
| C14ORF39_EX4-F | TCTGGCTCTAGGATCAGGCC      | 61.4    | 500                 |
| C14ORF39_EX4-R | AGTTCTATTTCTTCTGATCCTCCT  | 60.1    |                     |
| DDX25_EX10-F   | CATGGTGTCAAGCACAGC        | 59.4    | 539                 |
| DDX25_EX10-F   | ACGAGCATTATGTCAGGTGGA     | 57.9    |                     |
| DMC1_EX6-F     | GCTGATCCACTTGCCCATACA     | 60.41   | 490                 |
| DMC1_EX6-R     | TGAAAAGTGTTGATAAGACCCATCT | 58.46   |                     |
| DMC1_EX13-F    | AGCAGCTCCAAAACCTCACCT     | 59.52   | 502                 |
| DMC1_EX13-R    | AACACACAGCATCTGGCAGT      | 60.18   |                     |
| FANCM_EX22-F   | AGGCGCTCATAGTTACCCCT      | 60.4    | 488                 |
| FANCM_EX22-R   | ACCTGTTAGCCATCCTTTTCACA   | 60.18   |                     |
| GCNA_EX10-F    | AAACCACGGGCTTTACACCT      | 59.82   | 482                 |
| GCNA_EX10-R    | ACCTGTACCAGGGCTCATCT      | 59.96   |                     |
| HENMT1_EX4-F   | ACTCCACTCTCCTCCTCA        | 59.4    | 555                 |
| HENMT1_EX4-R   | GTTCAAATGCAGGCGGTGG       | 59.4    |                     |
| HENMT1_EX6-F   | TGCCTGGCCGAATAATTGT       | 57.3    | 518                 |
| HENMT1_EX6-R   | TGCCAAATGCAATGGTTCC       | 57.3    |                     |
| HFM1_EX32-F    | TAGGAACGACTGCCAGCAAA      | 57.3    | 560                 |
| HFM1_EX32-R    | TTCTTAGTCAAGCCACAAGT      | 55.9    |                     |
| MCM8_EX5-F     | TGGCACAAAGCTTATACTTATGTCA | 58.1    | 568                 |
| MCM8_EX5-R     | ATTTCTGCACAATCTTTAGCAAGA  | 55.9    |                     |

|               |                          |       |     |
|---------------|--------------------------|-------|-----|
| MCMDC2_EX14-F | AAAACCTTCGGGAGGGGAGTG    | 59.4  | 521 |
| MCMDC2_EX14-R | TGCCCAAATTAACAGGCCT      | 55.9  |     |
| MEIOB_EX12-F  | CAGAGGACTGGTGTACGCAG     | 61.4  | 528 |
| MEIOB_EX12-R  | TCCCAGGCTGTTTATTAGTGAA   | 56.5  |     |
| MSH5_EX8-F    | TCAGGCTGTGCTTTCAGACA     | 59.53 | 419 |
| MSH5_EX8-R    | AGGCCAGTACCTCCAGAAT      | 59.96 |     |
| PDHA2_F       | TCTGTCCGATCCATTCTCGC     | 59.61 | 380 |
| PDHA2_R       | CCTATCGACCTTTAGCCCAGG    | 60.18 |     |
| REC8_EX12-F   | GGGGCTTTTCTGGGAGTACC     | 61.4  | 501 |
| REC8_EX12-R   | CAAGGCTGCCATTACTCCT      | 59.4  |     |
| TDRD9_EX5-F   | TTAGATGAGCCAACCCCTGC     | 59.4  | 533 |
| TDRD9_EX5-R   | CAAACACAACATTCACCA       | 57.9  |     |
| TDRD9_EX30-F  | TGAAGAGAATGAGTTACATCCAGA | 59.28 | 438 |
| TDRD9_EX30-R  | CTGCACTCCAGCCTGAATGA     | 60.03 |     |
| TDRKH_EX7-F   | TGTACCTCTCACTACCCTGGT    | 59.8  | 519 |
| TDRKH_EX7-R   | TTCCATTCTCCAAGGTGCC      | 59.4  |     |

Supplementary table 3: Bibliographic information on the 151 NOA candidate genes.

See the online table:

<https://docs.google.com/spreadsheets/d/14uA4h43deSiwqdrKk81JYPOjnh-E0UI-jK9ntkyburg/edit?usp=sharing>

Supplementary Figure 1: Sanger sequencing confirmation of all identified gene variants.

Upper panels: Electrophoregrams from Sanger sequencing showing the identified variants. The substituted/deleted nucleotides are highlighted in green.

Lower Panel: Location of these variants within each gene and protein represented with domains (according to UniprotKB).



# C14orf39 ENST00000321731.7

Control

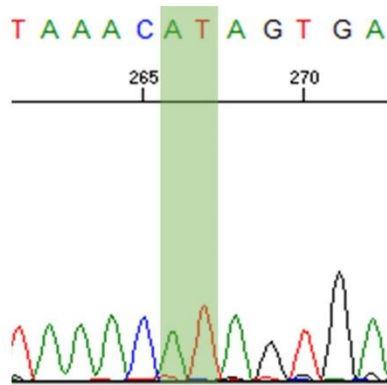

Patient

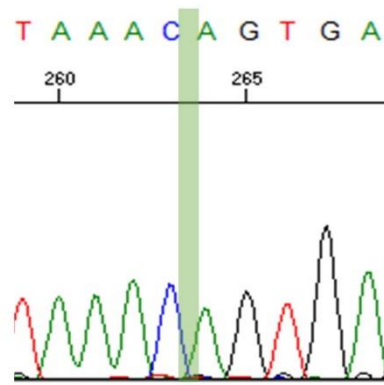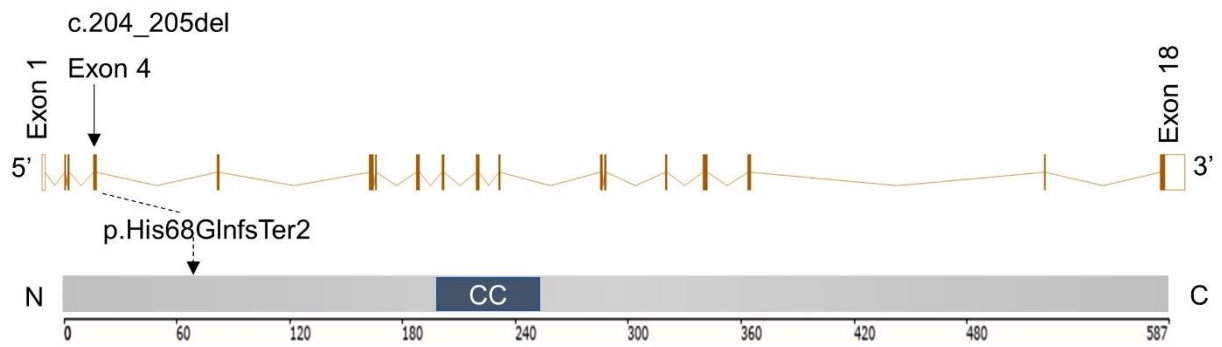

# DDX25 ENST00000263576.10

Control

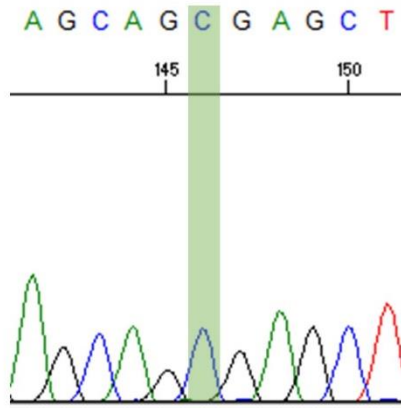

Patient

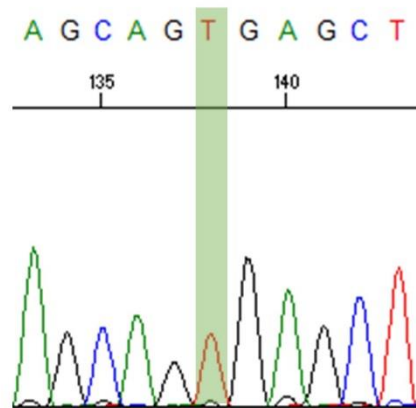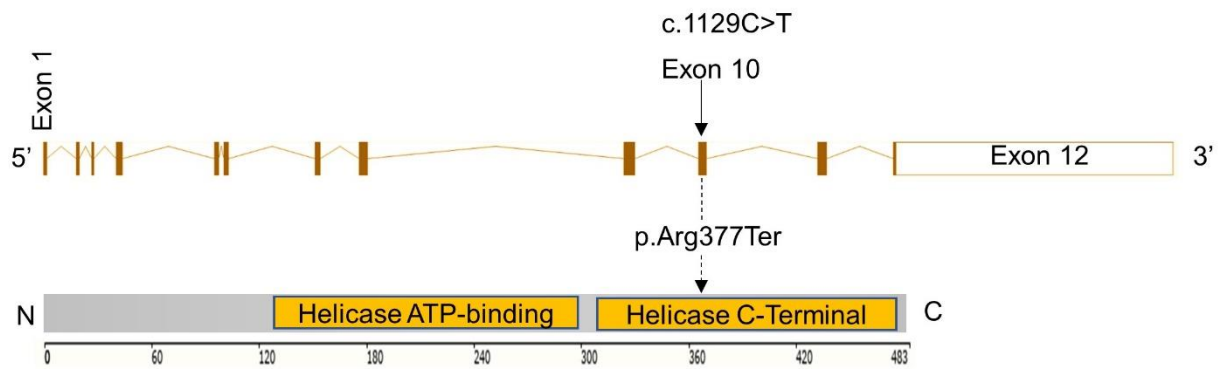

# DMC1 ENST00000216024.6

Exon 6

Control

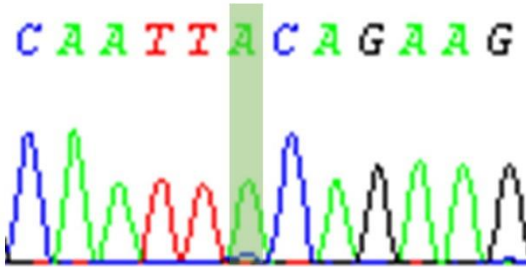

Patient

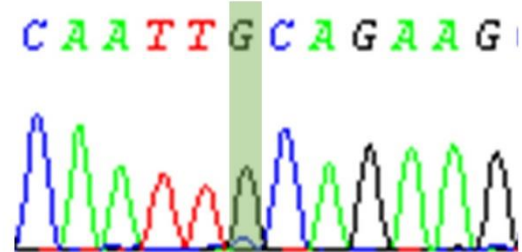

Exon 13

Control

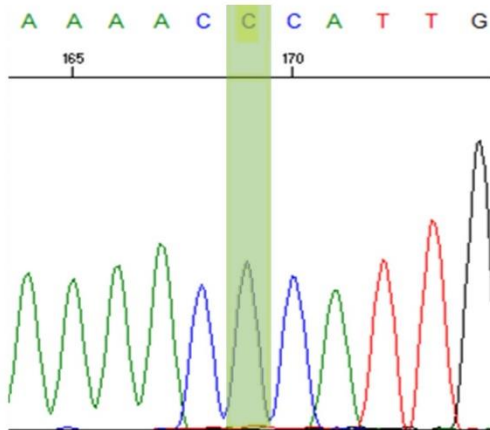

Patient

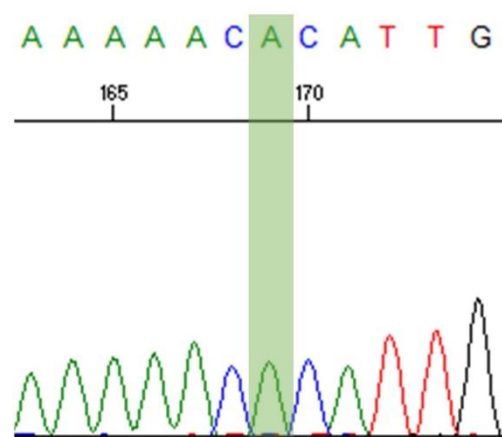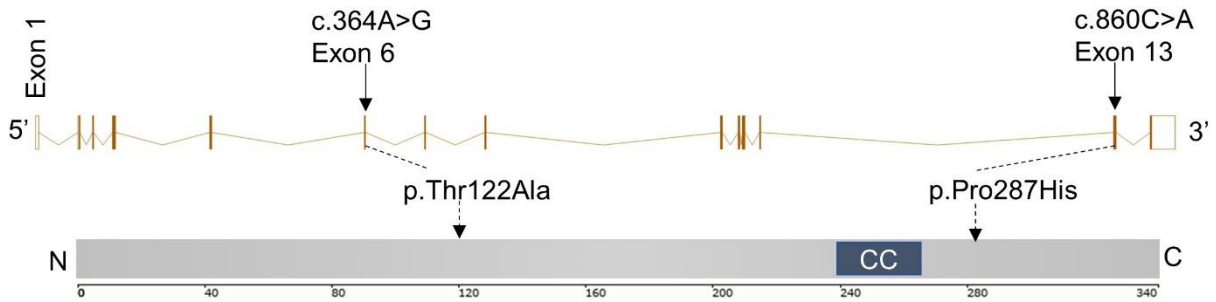

# FANCM ENST00000267430.9

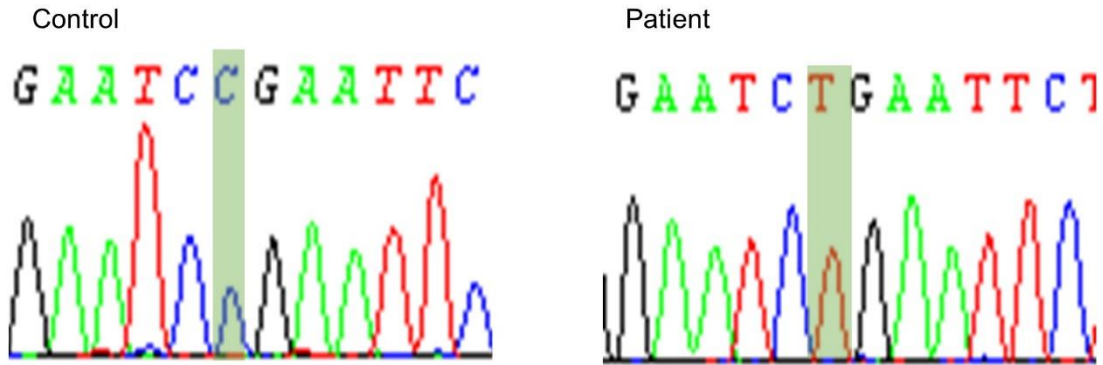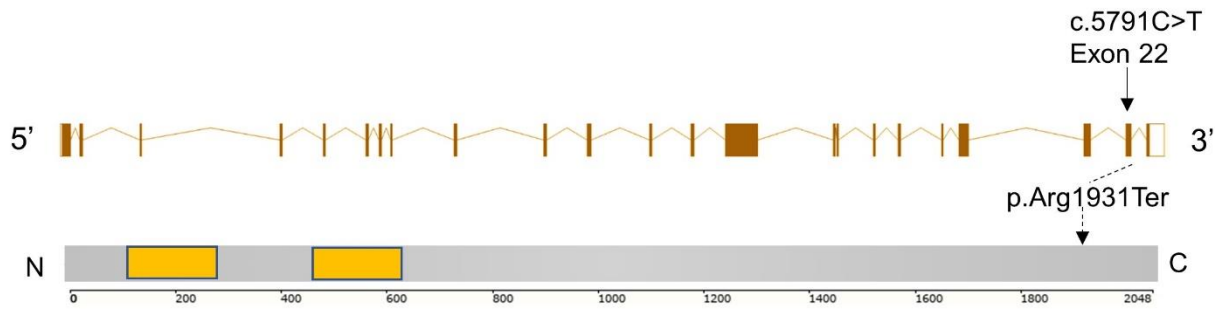

# GCNA ENST00000373695.1

Control

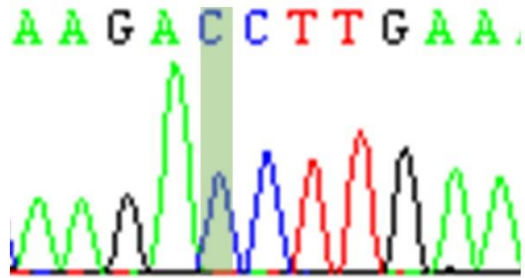

Patient

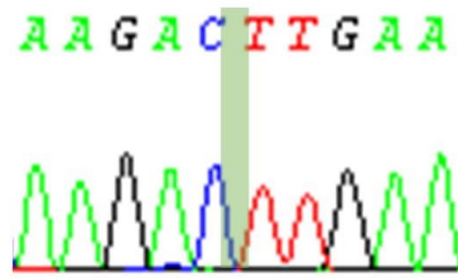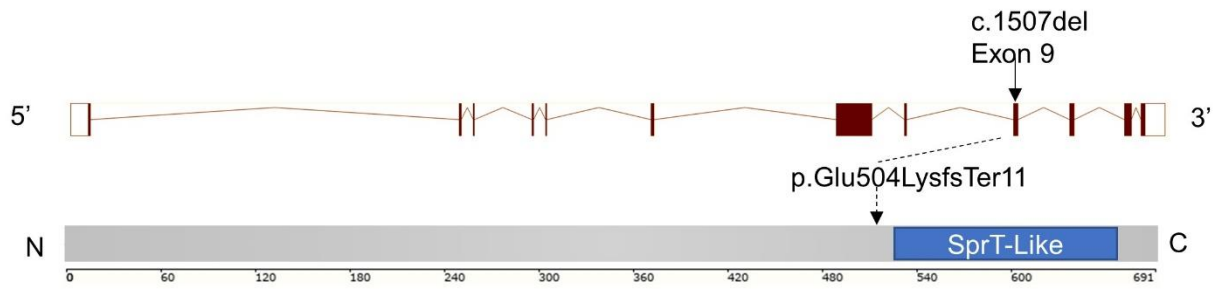

# HENMT1 ENST00000370032

Exon 4

Control

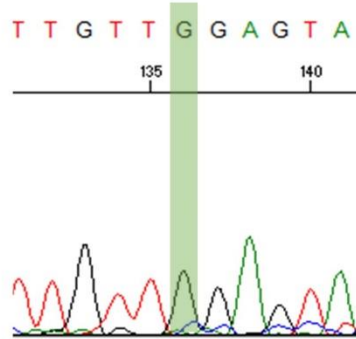

Patient

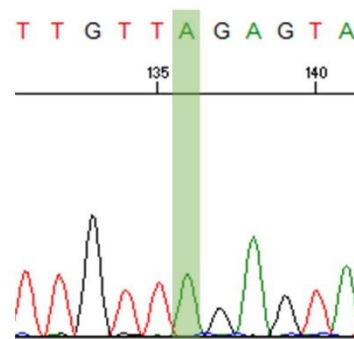

Exon 6

Control

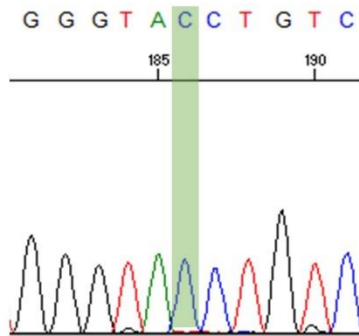

Patient

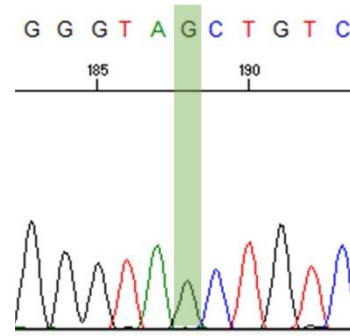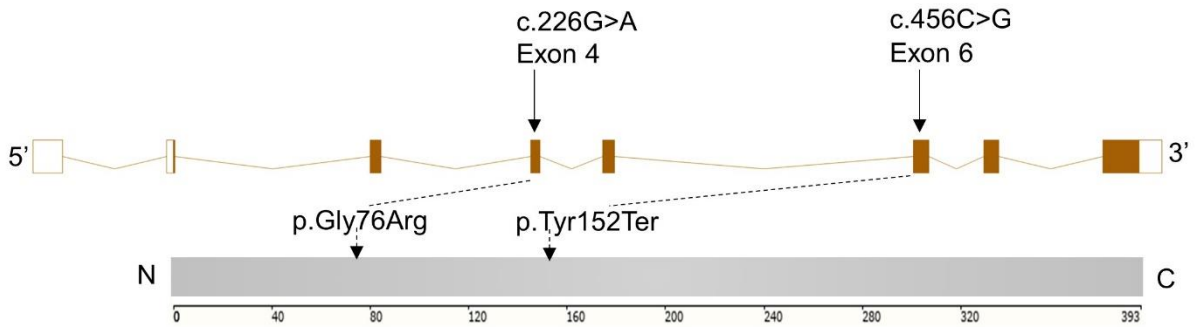

# HFM1 ENST00000370425.7

Control

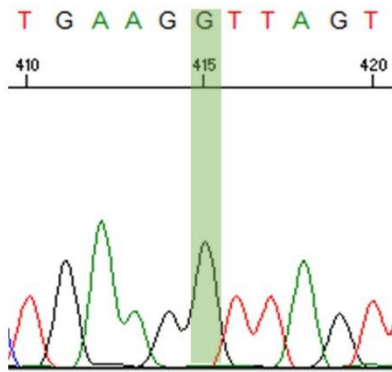

Patient

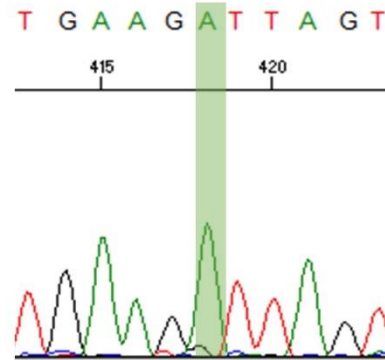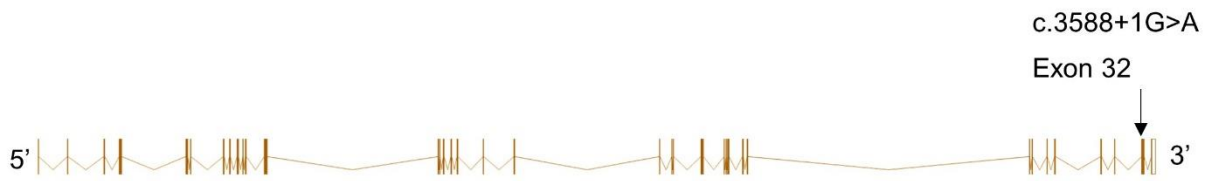

# MCM8 ENST00000378886.6

Control

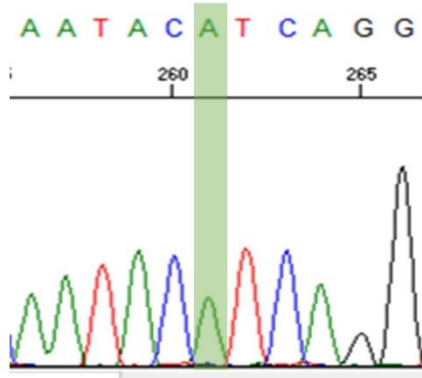

Patient

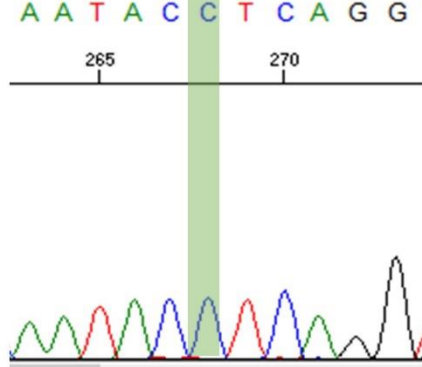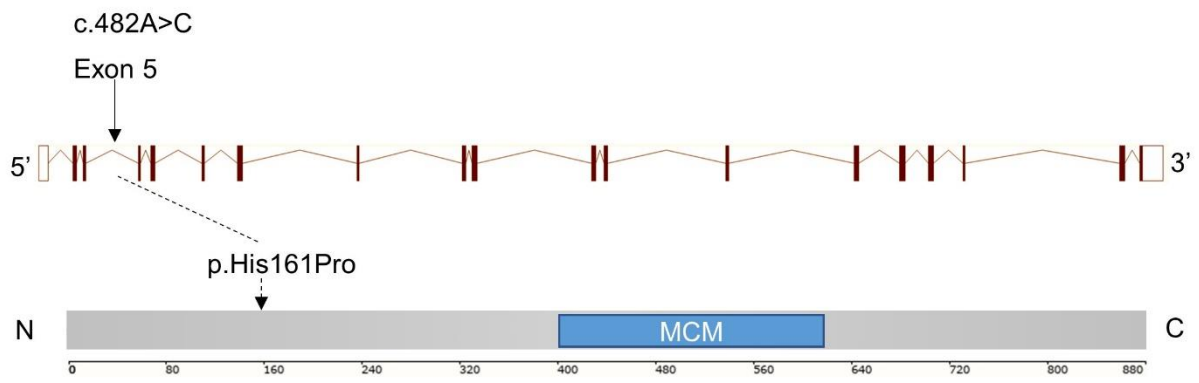



# MCMD2 ENST00000422365.6

Control

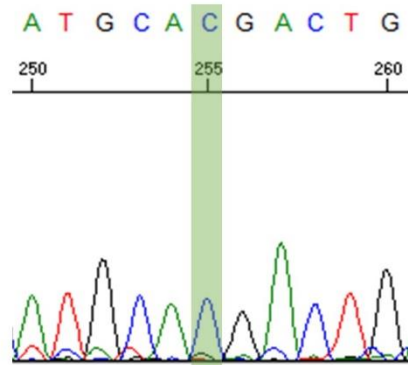

Patient

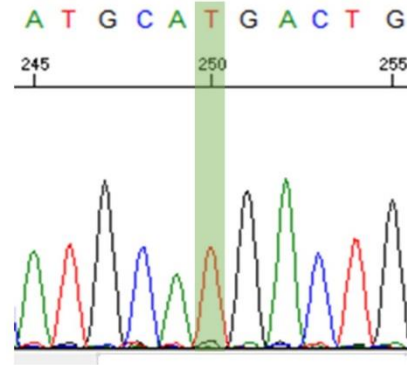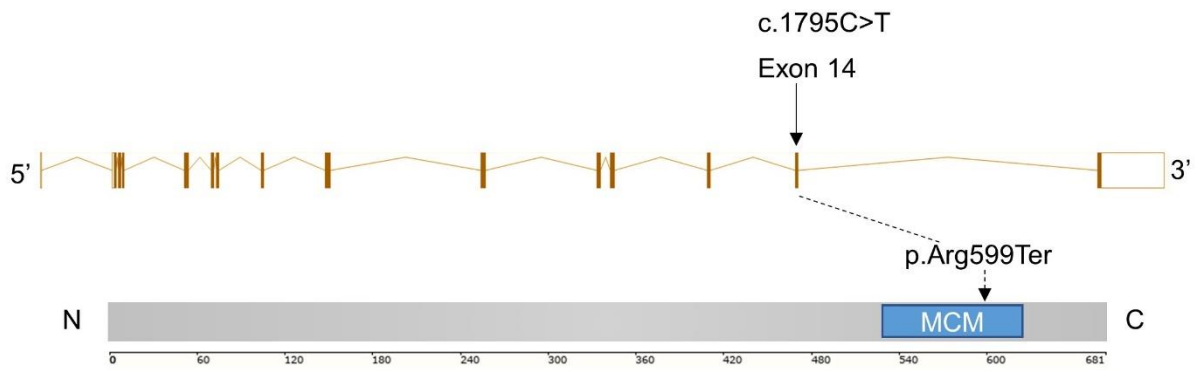

# MEIOB ENST00000325962.7

Control

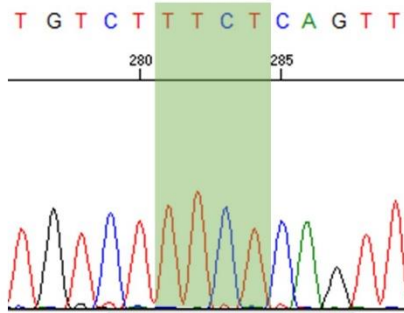

Patient

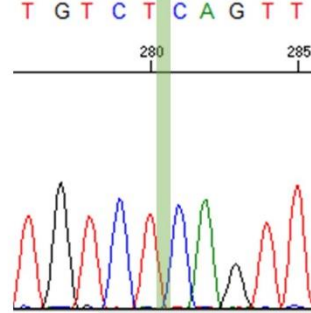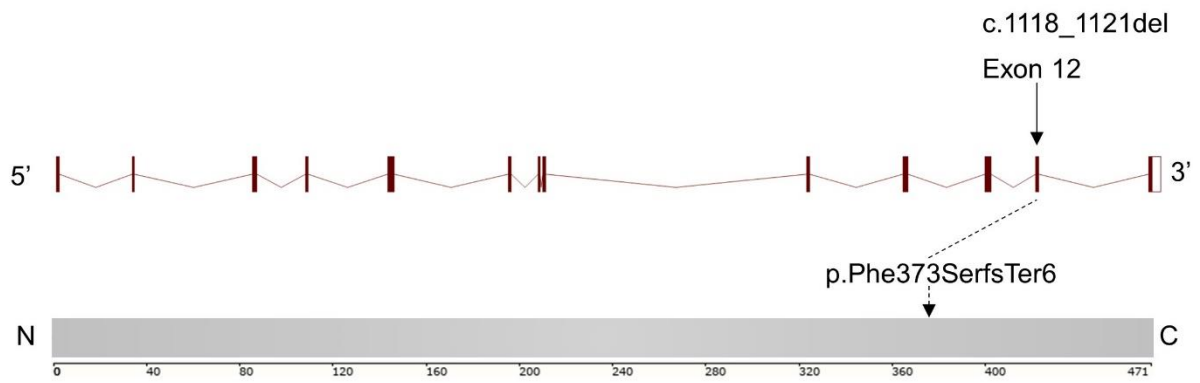

# MSH5 ENST00000375703.7

Control

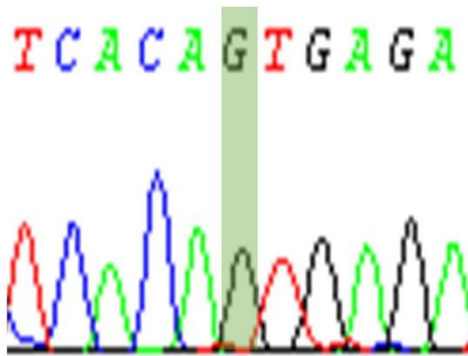

Patient

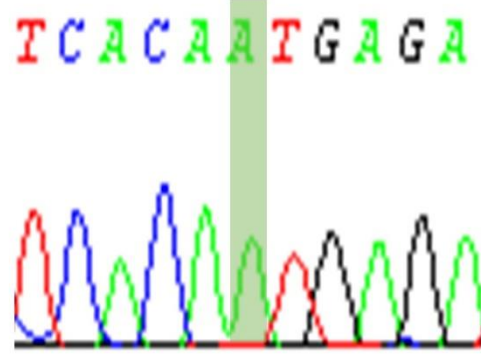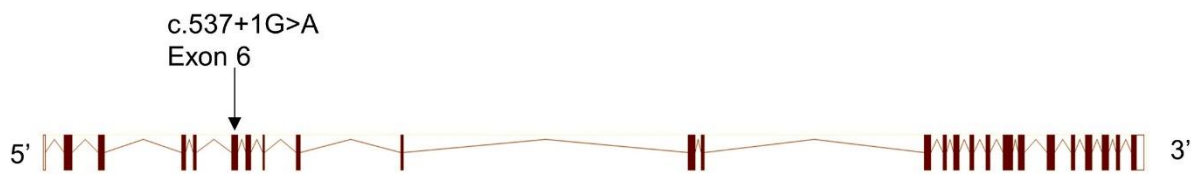

# PDHA2 ENST00000295266.5

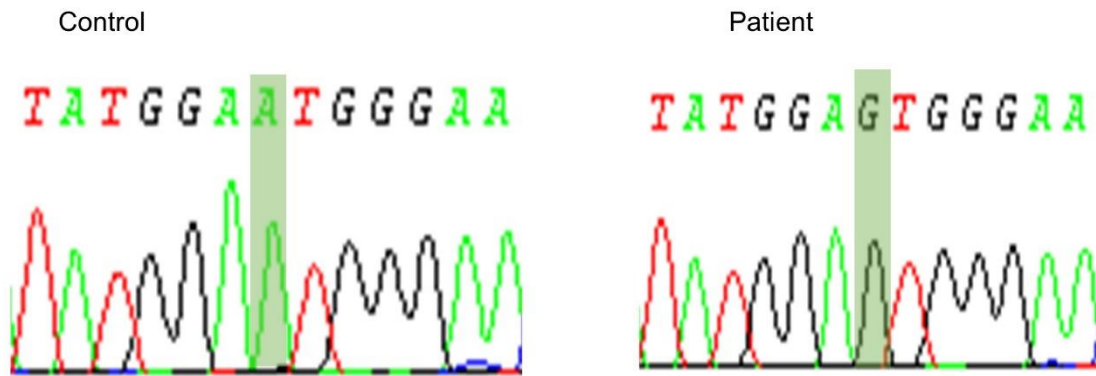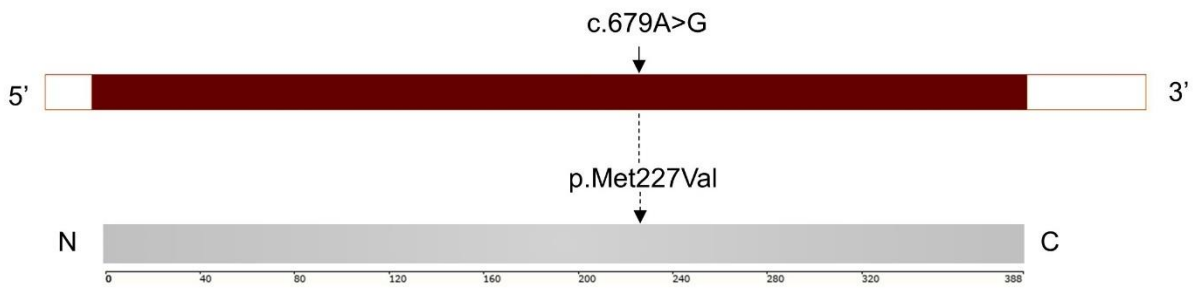

# REC8 ENST00000620473.4

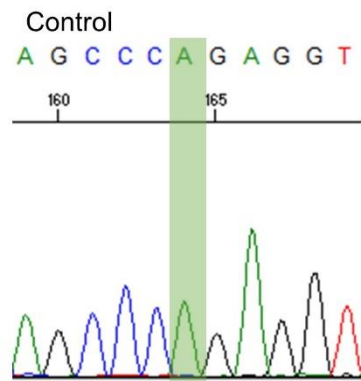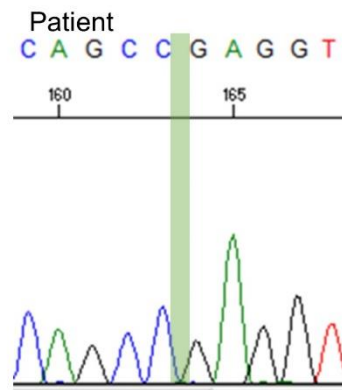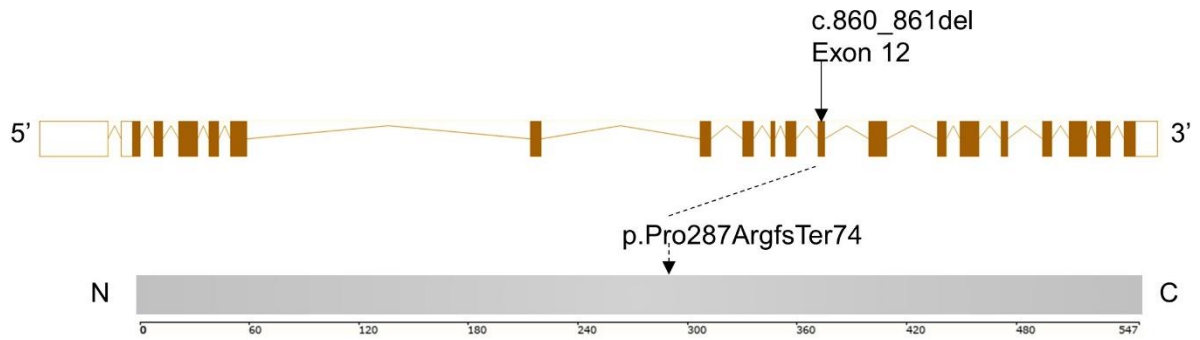

# TDRD9 ENST00000409874.8

Exon 30

Control

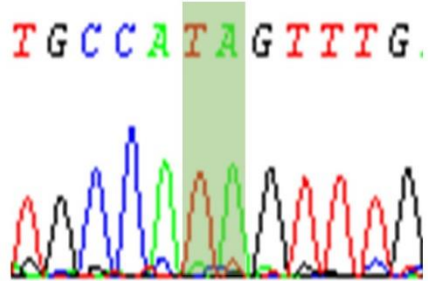

Patient

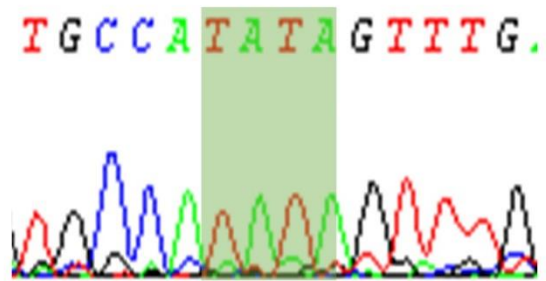

Exon 5

Control

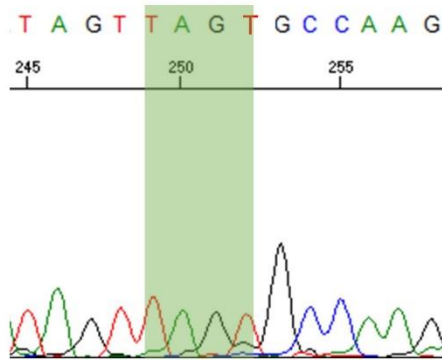

Patient

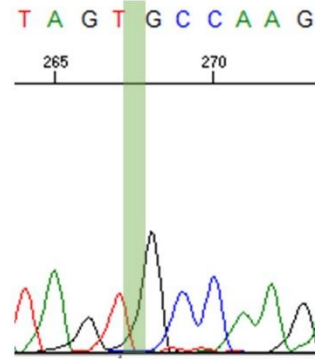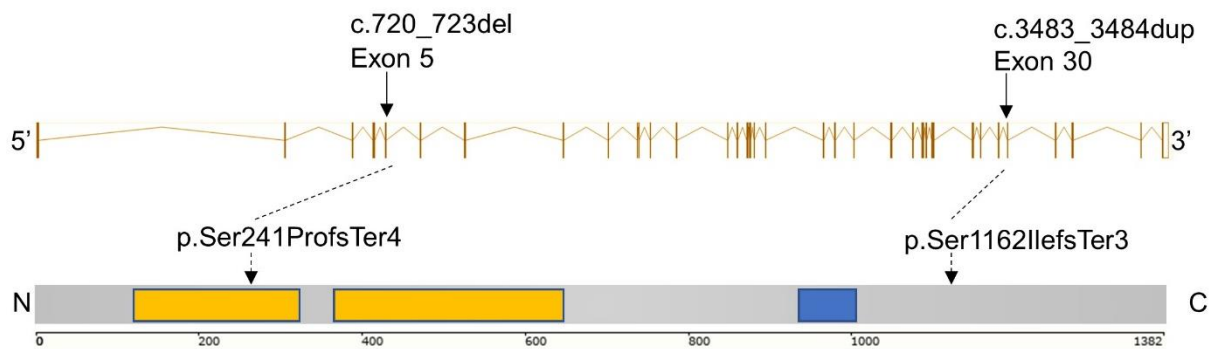

# TDRKH ENST00000368822.5

Control

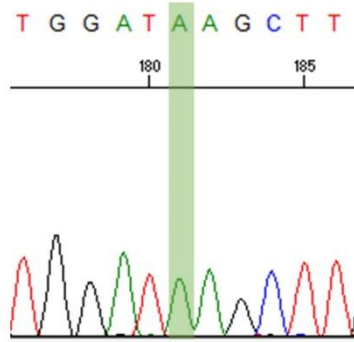

Patient

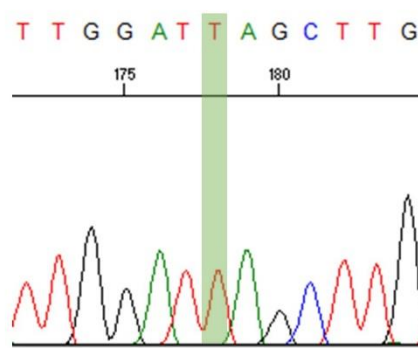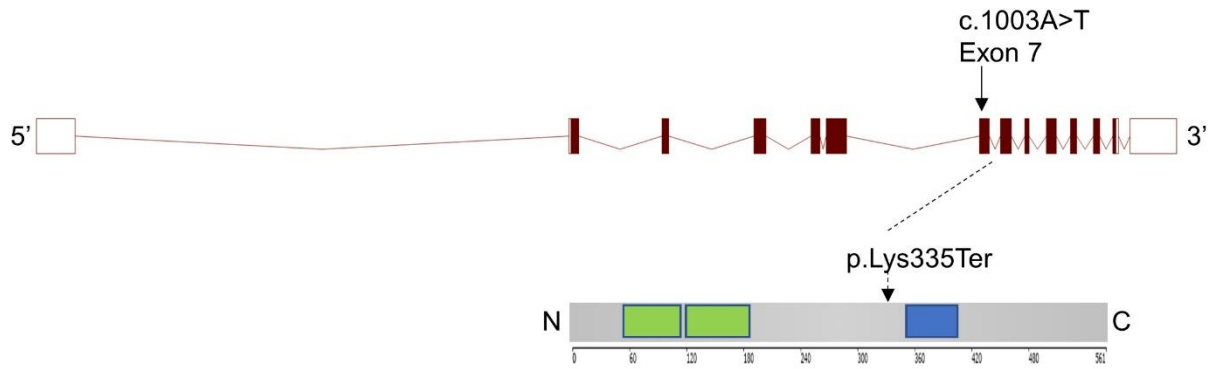

# TERB1 ENST00000433154.5

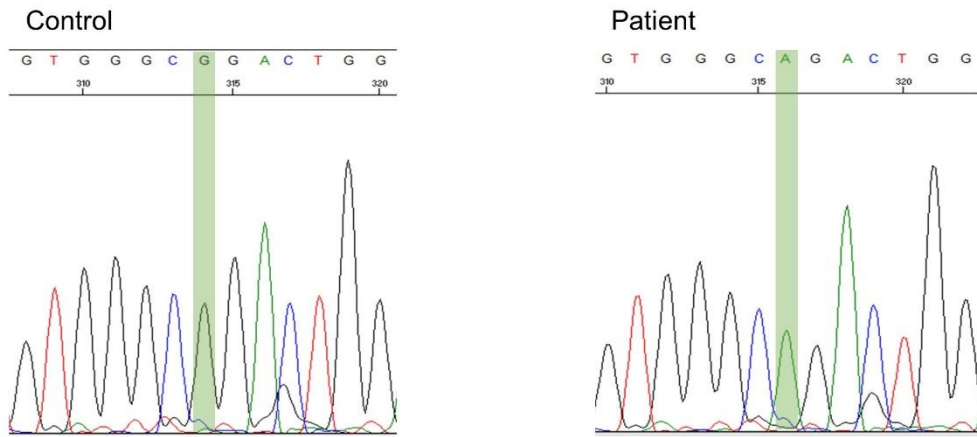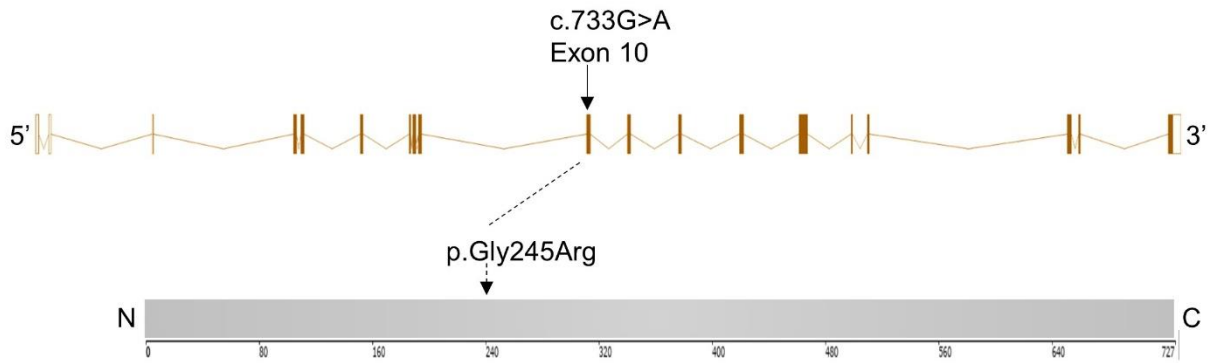

Supplement: mmc1.pdf [file mmc1.pdf]
